# Macroscale estimates of species abundance reveal evolutionary drivers of biodiversity

Keiichi Fukaya,<sup>1,2\*</sup> Buntarou Kusumoto,<sup>3</sup> Takayuki Shiono,<sup>3</sup> Junichi Fujinuma<sup>3</sup> and Yasuhiro Kubota<sup>3</sup>

<sup>1</sup>*National Institute for Environmental Studies, 16-2 Onogawa, Tsukuba, Ibaraki 305-8506 Japan*

<sup>2</sup>*The Institute of Statistical Mathematics, 10-3 Midoricho, Tachikawa, Tokyo, 190-8562 Japan*

<sup>3</sup>*Faculty of Science, University of the Ryukyus, 1 Senbaru, Nishihara, Okinawa, 903-0213 Japan*

\*fukaya.keiichi@nies.go.jp

September 24, 2018

## Abstract

Evolutionary processes underpin the biodiversity on the planet. Theories advocate that the form of the species abundance distribution (SAD), presented by the number of individuals for each species within an ecological community, is intimately linked to speciation modes such as point mutation and random fission. This prediction has rarely been, however, verified empirically; the fact that species abundance data can be obtained only from local communities critically limits our ability to infer the role of macroevolution in shaping ecological patterns. Here, we developed a novel statistical model to estimate macroscale SADs, the hidden macroecological property, by integrating spatially replicated multispecies detection-nondetection observations and the data on species geographic distributions. We determined abundance of 1,248 woody plant species at a 10 km grid square resolution over East Asian islands across subtropical to temperate biomes, which produced a metacommunity (i.e. species pool) SAD in four insular ecoregions along with its absolute size. The metacommunity SADs indicated lognormal-like distributions, which were well explained by the unified neutral theory of biodiversity and biogeography (UNTB) with protracted speciation, a mode of speciation intermediate between point mutation and random fission. Furthermore, the analyses yielded an estimate of speciation rate in each region that highlighted the importance of geographic characteristics in macroevolutionary processes and predicted the average species lifetime that was congruent with previous estimates. The estimation of macroscale SADs plays a remarkable role in revealing evolutionary diversification of regional species pools.

A better understanding of global patterns of species commonness and rarity has been a fundamental requirement in ecology and evolutionary biology since the time of Darwin (1859) (Hutchinson 1959, May 1988, Rosenzweig 1995). Nonetheless, we still lack a clear understanding of the patterns of

23 species abundance, especially at large spatial scales, such as those representing regional species  
24 pools. The unified neutral theory of biodiversity and biogeography (UNTB; Hubbell 2001) provides  
25 a mechanistic explanation of the origin and maintenance of biodiversity; based on the premise that  
26 all individuals in a system are functionally equivalent and thus follow neutral processes of  
27 demography, dispersal, and speciation, the UNTB derives species abundance distributions (SADs),  
28 at both local-community and meta-community (i.e. species pool) scales, in addition to a range of  
29 other macroecological and macroevolutionary patterns such as the species-area relationship  
30 (Rosindell *et al.* 2011),  $\beta$  diversity (Chave & Leigh 2002), and various phylogeny characteristics  
31 (Davies *et al.* 2011).

32 The UNTB bridges evolutionary biology and community ecology by linking, theoretically,  
33 macroevolutionary processes to biodiversity patterns. In particular, it predicts that the statistical  
34 form of the SAD in the metacommunity is dependent on the mode of speciation (Hubbell 2001,  
35 Etienne *et al.* 2007, Haegeman & Etienne 2010, Rosindell *et al.* 2010, Etienne & Haegeman 2011,  
36 Haegeman & Etienne 2017). The point mutation speciation model, which formed the basis of the  
37 first UNTB proposed by Hubbell (2001), models speciation as a process in which each new species is  
38 represented initially by a single individual. The point mutation speciation model predicts a  
39 metacommunity SAD that follows the logseries distribution, a distribution that is characterized by a  
40 relatively high proportion of rare species (Hubbell 2001, Etienne & Alonso 2005). In contrast, the  
41 random fission speciation model assumes that speciation occurs in the metacommunity owing to the  
42 random division of a population of an existing species. The random fission speciation model predicts  
43 a fairly even metacommunity structure, which is related to the MacArthur's (1957) broken-stick  
44 model (Haegeman & Etienne 2010, Etienne & Haegeman 2011). The point mutation speciation and  
45 random fission speciation represent the two extremes of a spectrum of speciation modes in UNTB.  
46 This spectrum of speciation modes has been argued to be unified with the concept of protracted  
47 speciation, which characterizes speciation as a gradual, drawn-out process (Rosindell *et al.* 2010,  
48 Haegeman & Etienne 2017). The UNTB with protracted speciation predicts a metacommunity SAD  
49 that follows a difference-logseries distribution. The difference-logseries distribution follows a logseries  
50 distribution at large abundances while behaving differently at small abundances; namely, it predicts  
51 fewer rare species than the logseries distribution (Rosindell *et al.* 2010, Haegeman & Etienne 2017).

52 Our ability to infer evolutionary processes that underpin observed biodiversity patterns is,

53 however, fundamentally limited because species abundance data can be obtained only from local  
54 communities. Indeed, earlier studies have shown that differences in the mode of speciation are hardly  
55 discerned based on samples from local communities as they may not leave a signature on SADs  
56 realized in dispersal-limited localities (Hubbell 2001, Etienne *et al.* 2007, Rosindell *et al.* 2010,  
57 Etienne & Haegeman 2011). The limitation in data acquisition also prohibits us from identifying the  
58 rate of speciation ( $\nu$ ) from SADs because local community SADs are determined by the fundamental  
59 biodiversity number ( $\theta$ ), which is a compound parameter depending both on  $\nu$  and the  
60 metacommunity size ( $J_M$ ) (Etienne & Alonso 2005, Etienne & Haegeman 2011; but see Etienne  
61 *et al.* 2007). Consequently, fundamental macroevolutionary properties of a metacommunity, such as  
62  $\nu$  and the average lifespan of the species ( $L$ ; Ricklefs 2003), have remained largely unknown.

63 A solution to these problems is to obtain data on species abundance over a huge spatial extent  
64 that directly informs about the size and biodiversity of the metacommunity; such data is, however,  
65 unrealistic. In this view, we developed a novel hierarchical model (Royle & Dorazio 2008, Kéry &  
66 Schaub 2012, Kéry & Royle 2016) that estimates SADs over a large geographic extent, which we  
67 named “macroscale SADs”. The model integrates spatially replicated multispecies  
68 detection-nondetection observations and information on the geographical distribution of species. We  
69 applied the model to a large dataset of woody plant communities in midlatitude forests on East  
70 Asian islands, including the Japanese archipelago. The dataset comprised more than 40 thousand  
71 vegetation survey records and various data sources for geographical ranges of species. The model  
72 enabled us to estimate macroscale abundance for 1,248 species at a 10 km grid square resolution.

73 Although defining a metacommunity is difficult in practice, discerned biogeographic divisions will  
74 approximate its theoretical definition as they can be regarded an evolutionary unit within which most  
75 member species spend their entire evolutionary lifetimes (Hubbell 2003). Thus, we pooled estimates  
76 of species abundance within four ecoregions that belong to different biogeographic divisions to obtain  
77 the metacommunity SADs (Fig. 1, detailed in Appendix B). Estimates of biodiversity patterns in  
78 the ecoregions are summarized in Table 1.

79 The SADs of metacommunities in the four ecoregions followed a left-skewed, lognormal-like  
80 distribution, whose short left tail indicates that the number of very rare species was negligible (Fig.  
81 1). This pattern of the metacommunity SADs were consistently well explained by the protracted  
82 speciation model (Table 2). Point mutation speciation model fitted relatively well at the largest

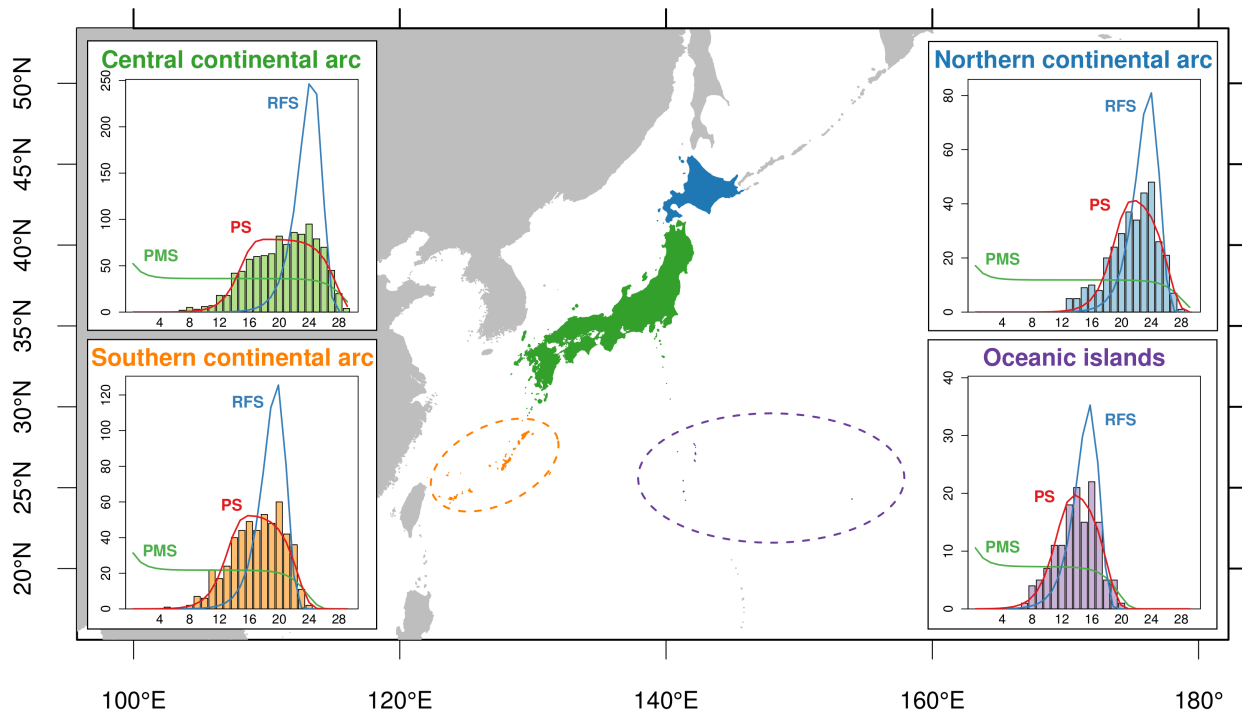

Fig. 1. **Metacommunity species abundance distribution in the four ecoregions of the East Asian islands.** Ecoregions are discerned by colour (central continental arc: green, northern continental arc: blue, southern continental arc: orange, oceanic islands: purple). Histograms in the inner panels represent the estimated metacommunity species abundance distributions (SADs). The coloured lines represent metacommunity SADs predicted by the three variants of the unified neutral theory of biodiversity and biogeography (UNTb) (PMS – point mutation speciation model; RFS – random fission speciation model; PS – protracted speciation model) fitted to the metacommunity SADs.  $x$ - and  $y$ -axis indicate the abundance octave and number of species, respectively. The  $j$ th abundance octave is defined as the range of abundance  $n$  satisfying  $2^{j-1} \leq n < 2^j$ .

83 abundance classes, but failed to predict the number of less common species and rare species.  
 84 Random fission speciation model overpredicted the number of moderately abundant species, while  
 85 underpredicting the number of less common species. The results suggest that the manner of species  
 86 diversification in these metacommunities was represented by neither of the two extreme modes, point  
 87 mutation speciation or random fission speciation, but by an intermediate process expressed as a  
 88 protracted speciation.

89 The macroscale SADs yielded estimates of the metacommunity size  $J_M$  for each ecoregion, which  
 90 enabled us to disentangle speciation rate  $\nu$  from the fundamental biodiversity number  $\theta$  (Table 1). A  
 91 higher speciation rate and shorter average lifetime of a species was observed in ecoregions composed  
 92 of small and isolated islands, the oceanic islands region, and the southern continental arc region  
 93 (Table 1), implying relatively rapid evolutionary turnover of the metacommunity in those regions.  
 94 The magnitude of  $L$  largely differed between the models; the point mutation speciation model

Table 1. **Estimates of community abundance, species richness, diversity index, and parameters relevant to the unified neutral theory of biodiversity.** Species diversity is represented by Shannon entropy. Parameters related to the neutral models are: fundamental biodiversity number  $\theta$ , speciation rate  $\nu$ , and average species lifetime (generations)  $L$ .

|                                   | Ecoregion              |                        |                        |                        |
|-----------------------------------|------------------------|------------------------|------------------------|------------------------|
|                                   | Central                | Northern               | Southern               | Oceanic                |
| Abundance                         |                        |                        |                        |                        |
| Total (metacommunity size $J_M$ ) | $1.67 \times 10^{10}$  | $3.37 \times 10^9$     | $3.29 \times 10^8$     | $6.35 \times 10^6$     |
| Mean                              | $4.73 \times 10^6$     | $3.40 \times 10^6$     | $2.27 \times 10^6$     | $3.53 \times 10^5$     |
| SD                                | $5.74 \times 10^6$     | $6.46 \times 10^6$     | $3.60 \times 10^6$     | $6.54 \times 10^5$     |
| Species richness                  |                        |                        |                        |                        |
| Total ( $\gamma$ -diversity)      | 1024                   | 328                    | 508                    | 141                    |
| Mean ( $\alpha$ -diversity)       | 241.7                  | 96.9                   | 198.4                  | 47.8                   |
| SD                                | 75.7                   | 33.0                   | 81.1                   | 34.2                   |
| Shannon entropy                   |                        |                        |                        |                        |
| Total ( $\gamma$ -diversity)      | 5.55                   | 4.83                   | 5.11                   | 3.97                   |
| Mean ( $\alpha$ -diversity)       | 4.58                   | 4.13                   | 4.18                   | 2.66                   |
| SD                                | 0.66                   | 0.45                   | 1.03                   | 1.12                   |
| Point mutation speciation model   |                        |                        |                        |                        |
| $\theta$                          | 52.27                  | 17.15                  | 31.40                  | 10.56                  |
| $\nu$                             | $3.13 \times 10^{-9}$  | $5.09 \times 10^{-9}$  | $9.55 \times 10^{-8}$  | $1.66 \times 10^{-6}$  |
| $L$                               | 19.6                   | 19.1                   | 16.2                   | 13.3                   |
| Random fission speciation model   |                        |                        |                        |                        |
| $\theta$                          | 1023.75                | 327.75                 | 507.75                 | 140.75                 |
| $\nu$                             | $3.76 \times 10^{-15}$ | $9.46 \times 10^{-15}$ | $2.38 \times 10^{-12}$ | $4.91 \times 10^{-10}$ |
| $L$                               | $1.63 \times 10^7$     | $1.03 \times 10^7$     | $6.48 \times 10^5$     | $4.51 \times 10^4$     |
| Protracted speciation model       |                        |                        |                        |                        |
| $\theta$                          | 113.51                 | 62.87                  | 76.65                  | 30.40                  |
| $\nu$                             | $2.65 \times 10^{-13}$ | $4.19 \times 10^{-14}$ | $2.96 \times 10^{-11}$ | $2.00 \times 10^{-9}$  |
| $L$                               | $2.22 \times 10^5$     | $2.13 \times 10^6$     | $4.96 \times 10^4$     | $1.07 \times 10^4$     |

95 predicted an average species lifetime of less than 20 generations, while the random fission speciation  
96 model predicted a very long lifetime, up to tens of millions of generations. Assuming that the average  
97 generation time of woody plants is about 30 years (Leigh *et al.* 1993, Nee 2005), the estimates of  
98 lifetime (i.e. hundreds of years in the point mutation speciation model and up to hundreds of millions  
99 of years in the random fission speciation model) are ecologically unrealistic for species. In contrast,  
100 the protracted speciation model provided moderate estimates of  $L$  that range from hundreds of  
101 thousands of years to tens of millions of years, which are comparatively congruent with previous  
102 estimates for species lifetime of vascular land plants based on fossil records (Niklas *et al.* 1983, 1985).

103 The UNTB, originally formulated with the point mutation and random fission speciation (Hubbell  
104 2001), can fit well to empirical SADs at local communities. However, it has been criticized because of  
105 failing to explain the evolutionary aspects such as average species lifetime (Ricklefs 2003, Nee 2005,  
106 Ricklefs 2006). The concept of the protracted speciation achieved a considerable advancement of the  
107 UNTB and led to realistic predictions about macroevolutionary patterns of communities (Rosindell

Table 2. **Model comparison for the fit of three variants of the unified neutral theory of biodiversity and biogeography (UNTB) and a Poisson lognormal model.** Models were compared based on their “composite likelihood” suggested by Alonso & McKane (2004): see Appendix B for details on the procedures for model fitting and comparison. Abbreviations: PMS – point mutation speciation model; RFS – random fission speciation model; PS – protracted speciation model; PLN – Poisson lognormal model; AIC – Akaike information criterion.

| Ecoregion | AIC      |          |          |          | Akaike weights |       |       |       |
|-----------|----------|----------|----------|----------|----------------|-------|-------|-------|
|           | PMS      | RFS      | PS       | PLN      | PMS            | RFS   | PS    | PLN   |
| Central   | 34745.61 | 36063.57 | 33676.69 | 33720.39 | 0.000          | 0.000 | 1.000 | 0.000 |
| Northern  | 11537.17 | 11250.08 | 11017.59 | 11022.41 | 0.000          | 0.000 | 0.917 | 0.083 |
| Southern  | 14509.06 | 14539.43 | 13921.48 | 14020.01 | 0.000          | 0.000 | 1.000 | 0.000 |
| Oceanic   | 3387.762 | 3306.939 | 3218.102 | 3220.650 | 0.000          | 0.000 | 0.781 | 0.219 |

108 *et al.* 2010, Rosindell & Phillimore 2011, Etienne & Rosindell 2012). Nevertheless, in the explanation  
109 of empirical SADs, its superiority over the other speciation modes has been unapparent, probably  
110 due to limited sample size (Rosindell *et al.* 2010). Our study fulfils the gap between these theoretical  
111 and empirical developments in the UNTB by revealing metacommunity SADs across the four  
112 ecoregions in East Asian islands and provides a strong support for the protracted speciation model.

113 An analysis of metacommunity SADs also highlighted region-specific evolutionary processes, which  
114 can shape large-scale biodiversity patterns relevant to geographic characteristics (e.g. area, degree of  
115 isolation, and other physiological conditions) of the regions (Qian & Ricklefs 2000, Xiang *et al.*  
116 2004, Qian *et al.* 2017). Greater estimates of the speciation rate in regions of southern continental  
117 arc and oceanic islands than in the other two continental arc regions (Table 1) clearly indicate that  
118 these regions bear greater species diversity relative to their small land area (i.e. the metacommunity  
119 size). They are likely to reflect adaptive/non-adaptive radiation driven by historical vicariance  
120 (Kubota *et al.* 2014, 2017), which may have led these regions to act as “cradles of biodiversity”  
121 (Rangel *et al.* 2018). A fundamental limitation in our analysis was, however, that an immigration of  
122 new species realized by a long-distance dispersal from other biogeographic regions cannot be  
123 distinguished from an endemic diversification of species, and therefore the estimates of speciation  
124 rate represent the joint consequence of these two processes. Long-distance dispersal is another  
125 critical macroecological process (Jabot *et al.* 2008, Rosindell *et al.* 2011, Whittaker *et al.* 2017)  
126 which is especially likely to be promoted in the southern continental arc region by the repeated land  
127 bridge connections throughout the Cenozoic. Future studies exploring a further theoretical and  
128 methodological development to infer the relative role of speciation and long-distance dispersal are  
129 warranted (Etienne & Haegeman 2011).

130 The key element of the present study was the methodological development of an estimation of  
131 macroscale SADs that have been the inaccessible property of biodiversity in evolutionary ecology.  
132 Macroscale SADs indicate fundamental properties of the species pool such as the absolute size of  
133 communities and species abundance. Their accurate estimates are critically informative for both  
134 basic and applied field of ecology and biogeography; the proposed approach will improve the  
135 identification of the species pool ( $\gamma$  diversity) along geographical gradients (de Bello *et al.* 2012,  
136 Karger *et al.* 2016), facilitating our understanding of the origin and maintenance of biodiversity from  
137 an evolutionary perspective, the evaluation of the role of macroevolutionary processes (e.g. abiotic  
138 filtering and adaptive radiation) in community assembly, and the design of the protected areas  
139 network to capture biodiversity processes.

## 140 References

- 141 Alonso, D. & McKane, A.J. (2004) Sampling Hubbell's neutral theory of biodiversity. *Ecology*  
142 *Letters*, **7**, 901–910.
- 143 Chave, J. & Leigh, E.G. (2002) A spatially explicit neutral model of  $\beta$ -diversity in tropical forests.  
144 *Theoretical Population Biology*, **62**, 153–168.
- 145 Crowther, T.W., Glick, H.B., Covey, K.R., Bettigole, C., Maynard, D.S., Thomas, S.M., Smith, J.R.,  
146 Hintler, G., Duguid, M.C., Amatulli, G., Tuanmu, M.-N., Jetz, W., Salas, C., Stam, C., Piotta,  
147 D., Tavani, R., Green, S., Bruce, G., Williams, S.J., Wiser, S.K., Huber, M.O., Hengeveld, G.M.,  
148 Nabuurs, G.-J., Tikhonova, E., Borchardt, P., Li, C.-F., Powrie, L.W., Fischer, M., Hemp, A.,  
149 Homeier, J., Cho, P., Vibrans, A.C., Umunay, P.M., Piao, S.L., Rowe, C.W., Ashton, M.S., Crane,  
150 P.R. & Bradford, M.A. (2015) Mapping tree density at a global scale. *Nature*, **525**, 201–205.
- 151 Darwin, C. (1859) *On the Origin of Species by Means of Natural Selection, or the Preservation of*  
152 *Favoured Races in the Struggle for Life*. John Murray.
- 153 Davies, T.J., Allen, A.P., Borda-de-Água, L., Regetz, J. & Melián, C.J. (2011) Neutral biodiversity  
154 theory can explain the imbalance of phylogenetic trees but not the tempo of their diversification.  
155 *Evolution*, **65**, 1841–1850.
- 156 de Bello, F., Price, J.N., Münkemüller, T., Liira, J., Zobel, M., Thuiller, W., Gerhold, P.,

- 157 Götzenberger, L., Lavergne, S., Lepš, J., Zoebel, K. & Pärtel, M. (2012) Functional species pool  
158 framework to test for biotic effects on community assembly. *Ecology*, **93**, 2263–2273.
- 159 Etienne, R.S. & Alonso, D. (2005) A dispersal-limited sampling theory for species and alleles.  
160 *Ecology Letters*, **8**, 1147–1156.
- 161 Etienne, R.S., Apol, M.E.F., Olff, H. & Weissing, F.J. (2007) Modes of speciation and the neutral  
162 theory of biodiversity. *Oikos*, **116**, 241–258.
- 163 Etienne, R.S. & Haegeman, B. (2011) The neutral theory of biodiversity with random fission  
164 speciation. *Theoretical Ecology*, **4**, 87–109.
- 165 Etienne, R.S. & Rosindell, J. (2012) Prolonging the past counteracts the pull of the present:  
166 protracted speciation can explain observed slowdowns in diversification. *Systematic Biology*, **61**,  
167 204–213.
- 168 Haegeman, B. & Etienne, R.S. (2010) Self-consistent approach for neutral community models with  
169 speciation. *Physical Review E*, **81**, 031911.
- 170 Haegeman, B. & Etienne, R.S. (2017) A general sampling formula for community structure data.  
171 *Methods in Ecology and Evolution*, **8**, 1506–1519.
- 172 Hubbell, S.P. (2001) *The Unified Neutral Theory of Biodiversity and Biogeography*. Princeton  
173 University Press.
- 174 Hubbell, S.P. (2003) Modes of speciation and the lifespans of species under neutrality: a response to  
175 the comment of Robert E. Ricklefs. *Oikos*, **100**, 193–199.
- 176 Hutchinson, G.E. (1959) Homage to Santa Rosalia or why are there so many kinds of animals?  
177 *American Naturalist*, **93**, 145–159.
- 178 Jabot, F., Etienne, R.S. & Chave, J. (2008) Reconciling neutral community models and  
179 environmental filtering: theory and an empirical test. *Oikos*, **117**, 1308–1320.
- 180 Karger, D.N., Cord, A.F., Kessler, M., Kreft, H., Kühn, I., Pompe, S., Sandel, B., Cabral, J.S.,  
181 Smith, A.B., Svenning, J.-C., Tuomisto, H., Weigelt, P. & Wesche, K. (2016) Delineating  
182 probabilistic species pools in ecology and biogeography. *Global Ecology and Biogeography*, **25**,  
183 489–501.



- 184 Kéry, M. & Royle, J.A. (2016) *Applied Hierarchical Modeling in Ecology: Analysis of Distribution,*  
185 *Abundance and Species Richness in R and BUGS. Volume 1: Prelude and Static Models.*  
186 Academic Press.
- 187 Kéry, M. & Schaub, M. (2012) *Bayesian Population Analysis using WinBUGS: A Hierarchical*  
188 *Perspective.* Academic Press.
- 189 Kubota, Y., Hirao, T., Fujii, S., Shiono, T. & Kusumoto, B. (2014) Beta diversity of woody plants in  
190 the Japanese archipelago: the roles of geohistorical and ecological processes. *Journal of*  
191 *Biogeography*, **41**, 1267–1276.
- 192 Kubota, Y., Kusumoto, B., Shiono, T. & Tanaka, T. (2017) Phylogenetic properties of Tertiary relict  
193 flora in the east Asian continental islands: imprint of climatic niche conservatism and in situ  
194 diversification. *Ecography*, **40**, 436–447.
- 195 Kubota, Y., Shiono, T. & Kusumoto, B. (2015) Role of climate and geohistorical factors in driving  
196 plant richness patterns and endemism on the east Asian continental islands. *Ecography*, **38**,  
197 639–648.
- 198 Leigh, E.G., Wright, S.J., Herre, E.A. & Putz, F.E. (1993) The decline of tree diversity on newly  
199 isolated tropical islands: a test of a null hypothesis and some implications. *Evolutionary Ecology*,  
200 **7**, 76–102.
- 201 MacArthur, R.H. (1957) On the relative abundance of bird species. *Proceedings of the National*  
202 *Academy of Sciences*, **43**, 293–295.
- 203 May, R.M. (1988) How many species are there on earth? *Science*, **241**, 1441–1449.
- 204 Nee, S. (2005) The neutral theory of biodiversity: do the numbers add up? *Functional Ecology*, **19**,  
205 173–176.
- 206 Niklas, K.J., Tiffney, B.H. & Knoll, A.H. (1985) Patterns in vascular land plant diversification: an  
207 analysis at the species level. J.W. Valentine, ed., *Phanerozoic Diversity Patterns: Profiles in*  
208 *Macroevolution*, chapter 3, pp. 97–128. Princeton University Press.
- 209 Niklas, K.J., Tiffney, B.H. & Knoll, A.H. (1983) Patterns in vascular land plant diversification.  
210 *Nature*, **303**, 614–616.

- 211 Qian, H., Jin, Y. & Ricklefs, R.E. (2017) Phylogenetic diversity anomaly in angiosperms between  
212 eastern Asia and eastern North America. *Proceedings of the National Academy of Sciences*, **114**,  
213 11452–11457.
- 214 Qian, H. & Ricklefs, R.E. (2000) Large-scale processes and the Asian bias in species diversity of  
215 temperate plants. *Nature*, **407**, 180–182.
- 216 Rangel, T.F., Edwards, N.R., Holden, P.B., Diniz-Filho, J.A.F., Gosling, W.D., Coelho, M.T.P.,  
217 Cassemiro, F.A.S., Rahbek, C. & Colwell, R.K. (2018) Modeling the ecology and evolution of  
218 biodiversity: biogeographical cradles, museums, and graves. *Science*, **361**, eaar5452.
- 219 Ricklefs, R.E. (2003) A comment on Hubbell’s zero-sum ecological drift model. *Oikos*, **100**, 185–192.
- 220 Ricklefs, R.E. (2006) The unified neutral theory of biodiversity: do the numbers add up? *Ecology*,  
221 **87**, 1424–1431.
- 222 Rosenzweig, M.L. (1995) *Species Diversity in Space and Time*. Cambridge University Press.
- 223 Rosindell, J., Cornell, S.J., Hubbell, S.P. & Etienne, R.S. (2010) Protracted speciation revitalizes the  
224 neutral theory of biodiversity. *Ecology Letters*, **13**, 716–727.
- 225 Rosindell, J., Hubbell, S.P. & Etienne, R.S. (2011) The unified neutral theory of biodiversity and  
226 biogeography at age ten. *Trends in Ecology and Evolution*, **26**, 340–348.
- 227 Rosindell, J. & Phillimore, A.B. (2011) A unified model of island biogeography sheds light on the  
228 zone of radiation. *Ecology Letters*, **14**, 552–560.
- 229 Royle, J.A. & Dorazio, R.M. (2008) *Hierarchical Modeling and Inference in Ecology: The Analysis of*  
230 *Data from Populations, Metapopulations and Communities*. Academic Press.
- 231 Takhtajan, A. (1986) *Floristic Regions of the World*. University of California Press.
- 232 Whittaker, R.J., Fernández-Palacios, J.M., Matthews, T.J., Borregaard, M.K. & Triantis, K.A.  
233 (2017) Island biogeography: taking the long view of nature’s laboratories. *Science*, **357**, eaam8326.
- 234 Xiang, Q.Y., Zhang, W.H., Ricklefs, R.E., Qian, H., Chen, Z.D., Wen, J. & Li, J.H. (2004) Regional  
235 differences in rates of plant speciation and molecular evolution: a comparison between eastern  
236 Asia and eastern North America. *Evolution*, **58**, 2175–2184.

## 237 **Acknowledgements**

238 We thank S. Eguchi and O. Komori for their helpful comments and discussion. We are grateful to T.  
239 J. Matthews for valuable comments and editing. We are particularly grateful to local botanists,  
240 vegetation researchers, and naturalists who have accumulated the information on plant distribution  
241 through their fieldwork steadily over the past decades. This research was supported by an allocation  
242 of computing resources of the SGI ICE X and SGI UV 2000 supercomputers from the Institute of  
243 Statistical Mathematics. Financial support was provided by the Japan Society for the Promotion of  
244 Science (no. 15H04424), the Environment Research and Technology Development fund of the  
245 Ministry of the Environment, Japan (4-1501), and Program for Advancing Strategic International  
246 Networks to Accelerate the Circulation of Talented Researchers, Japan Society for the Promotion of  
247 Science.

## 248 **Author Contributions**

249 Y.K. conceived the ideas; B.K. and T.S. compiled the data; K.F. designed the methodology and  
250 conducted data analyses; J.F. contributed to data interpretation and model development; K.F. and  
251 Y.K. coordinated the writing of the manuscript. All authors discussed the results and contributed  
252 critically to the drafts.

## 253 **Competing interests**

254 The authors declare no competing interests.

## 255 **Methods**

256 We developed a novel class of hierarchical models that can estimate SADs in discrete geographical  
257 units (i.e. grid cells) from spatially replicated multispecies detection-nondetection observations, in  
258 combination with various sources of data about the geographic distribution of species. The proposed  
259 model includes indicators of species presence and conditional individual density as its latent state  
260 variable, thereby enabling us to make an explicit prediction about the abundance of each species in  
261 each grid by fitting the model to available data. The formulation and statistical inference of the  
262 model are detailed in Appendix A.

263 The model was applied to a dataset of woody plant communities in midlatitude forests in Japan.  
264 The details of this application are fully described in Appendix B. Briefly, a large dataset comprised  
265 of 40,547 vegetation survey records collected within natural forests, species occurrence records,  
266 species distribution maps, and regional species checklists were used to estimate the abundance of  
267 1,248 woody plant species within 4,684 ten-kilometre grid cells, which covered almost all the woody  
268 plant species and the entire land area of Japan. The estimates of species abundance, obtained  
269 through the empirical Bayes procedure, were then validated based on independent local abundance  
270 datasets of woody plant communities obtained in forest inventory plots. Although there was a  
271 tendency of underprediction, this validation has confirmed a positive correlation between the  
272 predicted and observed log abundance of woody plant species (Appendix B). It was also shown that  
273 the magnitude of the estimates of total abundance of woody plants in natural forests in the region  
274 was consistent with a recent global estimate of tree abundance (Crowther *et al.* 2015) (Appendix B).

275 Based on the results of model fitting, metacommunity SADs were obtained for the four ecoregions  
276 on the East Asian islands (i.e. the central, northern, southern, and oceanic region) by aggregating  
277 abundance estimates over grids within each region (Appendix B). For each ecoregion, three variants  
278 of the UNTB were fitted to the estimate of the metacommunity SAD. The fitted model included the  
279 point mutation speciation model (Hubbell 2001, Etienne & Alonso 2005), random fission speciation  
280 model (Etienne & Haegeman 2011), and protracted speciation model (Rosindell *et al.* 2010); for  
281 these models, a probability function of the metacommunity species abundance vector (i.e. likelihood  
282 function for metacommunity SAD) and/or an analytical solution of the SAD in the stationary  
283 metacommunity has been obtained and can be used for model fitting. Estimates of the speciation  
284 rate  $\nu$  and mean species lifetime  $L$  were derived as a function of the estimated parameters (including  
285  $\theta$ ) and metacommunity size  $J_M$ .

## 286 **Data availability**

287 The datasets generated and analysed during the current study are available from the corresponding  
288 author upon reasonable request.

## 289 **Appendix A: Statistical framework to estimate macroscale SADs**

290 In this section, we describe a class of hierarchical models that estimates SADs in discrete  
291 geographical units (i.e. grid cells) from spatially replicated multispecies detection-nondetection  
292 observations, in combination with various data sources indicating the geographic distribution of  
293 species (Fig. 2). A hierarchical model is composed of a series of submodels, including an observation  
294 model describing the distribution of data conditional on some latent state variables and a system  
295 model describing the variation in the state variables (Royle & Dorazio 2008, Kéry & Schaub 2012,  
296 Kéry & Royle 2016). In the following, we first describe a generalized linear mixed model (GLMM),  
297 which explains the multispecies detection-nondetection observations in terms of individual density of  
298 each species and therefore explicitly links binary observations to underlying SADs. Then, we extend  
299 this model to incorporate other sources of information about species occurrence that facilitate the  
300 inference of abundance for a number of species over a large geographical extent.

### 301 **A model for spatially replicated detection-nondetection observations**

302 We assume that there is a set of geographic areas of interest that contain  $I$  species of interest and  
303 are divided into  $J$  geographical grids. Suppose that grid  $j$  ( $j = 1, \dots, J$ ) contains  $K_j > 0$  replicated  
304 sampling plots in which occurrence was assessed for each species. We denote detection (1) or  
305 nondetection (0) of species  $i$  in plot  $k$  in grid  $j$  as  $y_{ijk}$  ( $i = 1, \dots, I; j = 1, \dots, J; k = 1, \dots, K_j$ ). We  
306 also assume that the area of each sampling plot was recorded, and denote the area of sampling plot  $k$   
307 in grid  $j$  as  $a_{jk}$ .

308 The goal of the inference is to estimate the abundance of each species within each grid from these  
309 locally replicated detection-nondetection observations. To achieve this, we explicitly make several  
310 key assumptions in the data generating process. First, we assume that individuals are distributed  
311 within some suitable habitats (e.g. forests) in which sampling plots are placed so that they never  
312 overlap. Second, we assume that for each grid the spatial point pattern of individuals within the  
313 habitats can be regarded as an independent superposition of homogeneous Poisson point processes,  
314 each of which represents the spatial alignment of individuals of a species. In the ecological context,  
315 this assumption implies that the centres of individuals are regarded as points, and individuals are  
316 distributed independently of one another with species-specific individual densities that are constant  
317 within a grid (Illian *et al.* 2008).

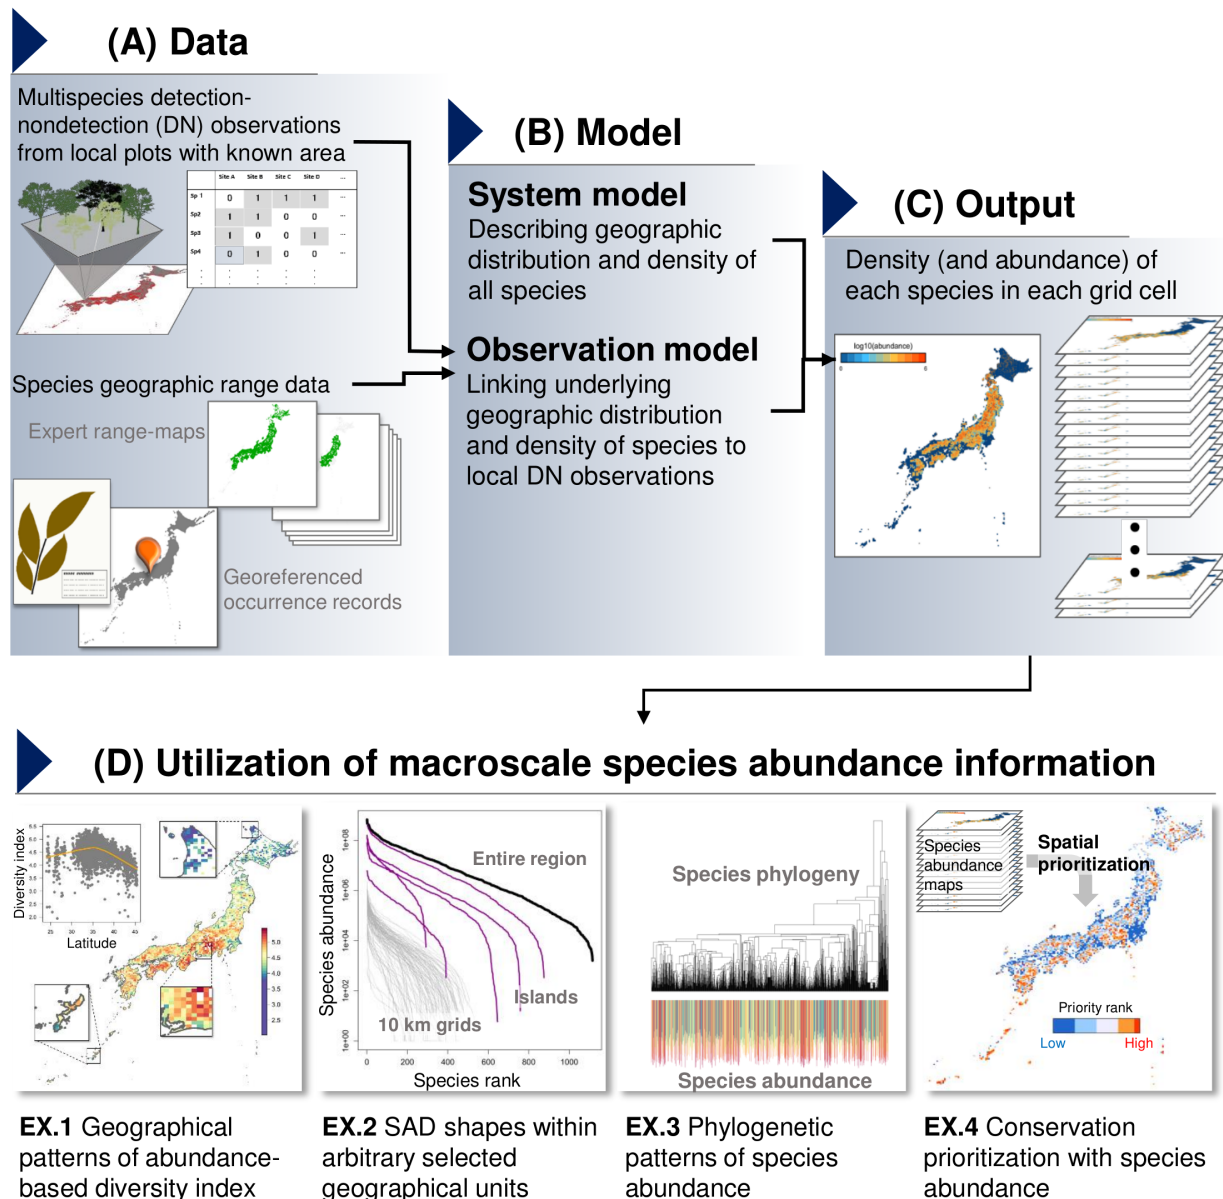

Fig. 2. **A framework for estimation of macroscale species abundance distributions (SADs).** Spatially replicated detection-nondetection observations and various information on species geographic distribution (A) are integrated in a hierarchical model that links binary observations to underlying species abundance (B). A model fitting yields estimates of individual density of each species in each geographic grid, which can then be used to derive estimates of species abundance with the area of suitable habitat (C). The results can be used for diverse purposes relevant to e.g. community ecology, macroecology, biogeography, and applied fields of ecology (D).

318 These assumptions give us a probability function that explicitly links the probability of species  
319 detection within a plot to the density of that species in the grid. Let us denote the individual  
320 density of species  $i$  in grid  $j$  by  $d_{ij}$ . Then, the number of individuals occurring in a plot of area  $a_{jk}$   
321 independently follows a Poisson distribution with a mean of  $d_{ij}a_{jk}$  (Illian *et al.* 2008). Therefore, the  
322 probability for detecting at least one individual of species  $i$  in plot  $k$  in grid  $j$ ,  $p_{ijk}$ , can be written as:

$$p_{ijk} = 1 - \exp(-d_{ij}a_{jk}) \quad (1)$$

323 where  $\exp(-d_{ij}a_{jk})$  corresponds to the probability mass of a Poisson distribution with a mean  $d_{ij}a_{jk}$   
324 at zero (i.e. a probability that the plot captures no individuals).

325 On the basis of these settings and assumptions, we provide a state space formulation of the first  
326 hierarchical model we consider, in which the model is described in terms of a series of submodels  
327 that are conditional on latent state variables and parameters (Royle & Dorazio 2008, Kéry & Schaub  
328 2012, Kéry & Royle 2016). The latent variable of the model was the grid-level individual density of  
329 species, which we have already defined as  $d_{ij}$ .

330 The observation model describes the occurrence of species within a sampling plot. We can regard  
331 the detection-nondetection observation of species,  $y_{ijk}$ , as a random variable that independently  
332 follows a Bernoulli distribution with a detection probability  $p_{ijk}$ :

$$y_{ijk} \sim \text{Bernoulli}(p_{ijk}), \quad (2)$$

333 where  $p_{ijk}$  is determined by Equation (1) under the assumption of the superposed homogenous  
334 Poisson point process.

335 The system model describes variation in the individual density  $d_{ij}$ . We decompose the logarithm  
336 of  $d_{ij}$  into an intercept term  $\mu$  and three normally distributed random effects, species  $e_i^{(1)}$ , grid  $e_j^{(2)}$ ,  
337 and the combination of species and grid  $e_{ij}^{(3)}$ :

$$\log d_{ij} = \mu + e_i^{(1)} + e_j^{(2)} + e_{ij}^{(3)} \quad (3)$$

$$e_i^{(1)} \sim \mathcal{N}(0, \sigma_1^2) \quad (4)$$

$$e_j^{(2)} \sim \mathcal{N}(0, \sigma_2^2) \quad (5)$$

$$e_{ij}^{(3)} \sim \mathcal{N}(0, \sigma_3^2). \quad (6)$$

338 These submodels jointly construct a Bernoulli GLMM with complementary log-log link, in which  
339  $a_{jk}$  is treated as an offset term. The model can therefore be fitted to data with standard GLMM  
340 packages that implement multiple random effects, such as **lme4** in **R** (Bates *et al.* 2015).

341 The model described above has a relatively simple structure, in which variation in individual  
342 density was explained only by several unstructured random effect components. The inclusion of  
343 random effects is essential in a multispecies distribution modelling as it enables us to “borrow  
344 strength” in the inference: it will improve the estimates for grids with few replicated plots and/or  
345 the estimates for rare species because information is shared across all grids and species through  
346 common distributions specified for random effects (Iknayan *et al.* 2014, Warton *et al.* 2015, Evans  
347 *et al.* 2016). In an analogous fashion to many other classes of hierarchical models and species  
348 distribution models (SDMs), environmental covariates could also be introduced in the system model  
349 to explicitly describe the association between environmental factors and individual density. In  
350 addition, the model could also explain the correlation structure of random effects on the geographic  
351 and/or phylogenetic space in an explicit manner (Ives & Helmus 2011, Kaldhusdal *et al.* 2015). Such  
352 generalizations will potentially enhance the model prediction and provide further ecological insights.  
353 However, they may be difficult to adopt in practice, especially in studies that examine a very large  
354 number of species and grids, as is the case with our application described in Appendix B, because  
355 the model may involve an excessive number of parameters and/or a huge covariance matrix,  
356 rendering the inference computationally challenging (Warton *et al.* 2015).

### 357 **Integrating grid-level occurrence information**

358 Owing to the fact that information is shared by random effects, the simple random effect model  
359 without any covariate can still provide estimates of individual density that are specific to each



360 species and grid. However, the estimates may be inaccurate especially in grids where the number of  
361 plots is limited and species density is low. To overcome this issue, we extend the model to integrate  
362 replicated detection-nondetection observations with data that may directly inform about the  
363 grid-level presence-absence of species such as species occurrence records and expert range maps.

364 We introduce a latent indicator state variable that represents the grid-level presence-absence of  
365 species and is denoted as  $z_{ij}$ . The detection probability  $p_{ijk}$  is then expressed as follows:

$$p_{ijk} = 1 - \exp(-z_{ij}d_{ij}a_{jk}), \quad (7)$$

366 which indicates that the detection probability is 0 when the species is absent in the grid ( $z_{ij} = 0$ ),  
367 but it takes  $1 - \exp(-d_{ij}a_{jk})$  when the species is present in the grid ( $z_{ij} = 1$ ). Hence,  $d_{ij}$  now  
368 represents the individual density that is *conditional* on the presence of that species.

369 We regard  $z_{ij}$  as a random variable following a Bernoulli distribution and add an additional  
370 system model component to describe it. By adopting a similar modelling approach applied for the  
371 individual density, the additional components can be constructed as follows:

$$z_{ij} \sim \text{Bernoulli}(\psi_{ij}) \quad (8)$$

$$\text{logit } \psi_{ij} = \eta + u_i^{(1)} + u_j^{(2)} \quad (9)$$

$$u_i^{(1)} \sim \mathcal{N}(0, \tau_1^2) \quad (10)$$

$$u_j^{(2)} \sim \mathcal{N}(0, \tau_2^2), \quad (11)$$

372 where  $\psi_{ij}$  is the occurrence probability of species  $i$  in grid  $j$ , which was decomposed into an intercept  
373 term  $\eta$  and two normally distributed random effects that vary over species  $u_i^{(1)}$  and grids  $u_j^{(2)}$  on a  
374 logit scale.

375 We assume that the grid-level species occurrence  $z_{ij}$  is partially observed via the plot-level  
376 detection-nondetection observations and/or the auxiliary grid-level presence-absence information. A  
377 grid-level presence of species may be registered, for example, by museum- or herbarium-based  
378 specimens and/or occurrence records, while absence of species may be deduced by exploiting, for  
379 example, expert range maps (Merow *et al.* 2017) and/or regional species checklists. In general, the  
380 information about the species absence should be treated conservatively because it is difficult to

381 verify (Merow *et al.* 2017); therefore, a larger weight should be placed on the evidence of species  
 382 presence than on that of species absence if different sources of data are in conflict.

383 Under these considerations, the conditional likelihood defined by our observation model (Equation  
 384 2) takes two cases depending on whether the presence-absence of the species is known or not.

385 Formally, we denote the vector of all parameters (i.e.  $\eta, \mu, \tau_1, \tau_2, \sigma_1, \sigma_2, \sigma_3$ ) and the vector of all  
 386 random effects (i.e.  $u_i^{(1)}, u_j^{(2)}, e_i^{(1)}, e_j^{(2)}$ , and  $e_{ij}^{(3)}$ ) by  $\boldsymbol{\theta}$  and  $\boldsymbol{\xi}$ , respectively. Let  $x_{ij} = 1$  denotes that  $z_{ij}$   
 387 is known for species  $i$  in grid  $j$  and  $x_{ij} = 0$  denotes otherwise. Then, by letting  $\mathbf{y}_{ij} = (y_{ij1}, \dots, y_{ijK_j})$   
 388 and  $\mathbf{D}_{ij} = (\mathbf{y}_{ij}, z_{ij})$ , the conditional likelihood,  $p(\mathbf{D}_{ij} | \boldsymbol{\xi}, \boldsymbol{\theta})$ , can be expressed as follows:

$$p(\mathbf{D}_{ij} | \boldsymbol{\xi}, \boldsymbol{\theta}) = \begin{cases} \psi_{ij}^{z_{ij}} (1 - \psi_{ij})^{1-z_{ij}} \left[ \prod_{k=1}^{K_j} \{1 - \exp(-z_{ij} d_{ij} a_{jk})\}^{y_{ijk}} \exp(-z_{ij} d_{ij} a_{jk})^{(1-y_{ijk})} \right] & x_{ij} = 1 \\ \psi_{ij} \left[ \prod_{k=1}^{K_j} \exp(-d_{ij} a_{jk}) \right] + (1 - \psi_{ij}) & x_{ij} = 0, \end{cases} \quad (12)$$

389 where in the former case, the conditional likelihood is given as a joint likelihood of  $\mathbf{y}_{ij}$  and  $z_{ij}$ , and  
 390 in the latter case, it is given by the marginalized likelihood of  $\mathbf{y}_{ij}$  because  $z_{ij}$  is missing. We note  
 391 that  $d_{ij}$  and  $\psi_{ij}$  are respectively a function of  $\boldsymbol{\xi}$  and  $\boldsymbol{\theta}$  (Equations (3) and (9)), although that is not  
 392 expressed explicitly in the right-hand side of the equations.

393 In this integrated model, geographical grids that contain no detection-nondetection observations  
 394 but have grid-level presence-absence information for some species can still contribute to the inference  
 395 of parameters. Let us now assume that the set of geographical areas of interest is divided into  $J$   
 396 geographical grids, in which grid  $j$  ( $j = 1, \dots, J$ ) contains  $K_j \geq 0$  plots. Then, for grid  $j$  such that  
 397  $K_j > 0$ , the conditional likelihood is expressed by Equation (12), and for other grids ( $K_j = 0$ ), it is  
 398 written as:

$$p(\mathbf{D}_{ij} | \boldsymbol{\xi}, \boldsymbol{\theta}) = \begin{cases} \psi_{ij}^{z_{ij}} (1 - \psi_{ij})^{1-z_{ij}} & x_{ij} = 1 \\ 1 & x_{ij} = 0. \end{cases} \quad (13)$$

### 399 Statistical inference

400 As a class of general hierarchical models, the integrated model can be fitted to data by using either  
 401 maximum marginal likelihood (also known as empirical Bayes) or fully Bayesian approach. Let us

402 denote  $\mathbf{D}$  as the vector of all data. In both approaches, inference is based on a joint distribution of  
 403 data and random effects,  $p(\mathbf{D}, \boldsymbol{\xi} | \boldsymbol{\theta})$ , which is also known as a complete data likelihood (King 2014).  
 404 In the former approach, estimation can be achieved via a two-stage procedure, where parameters are  
 405 estimated by maximizing a marginal likelihood  $p(\mathbf{D} | \boldsymbol{\theta}) = \int p(\mathbf{D}, \boldsymbol{\xi} | \boldsymbol{\theta}) d\boldsymbol{\xi}$  and then, maximum a  
 406 posteriori probability (MAP) estimates of random effects can be obtained conditionally on the  
 407 parameter estimates  $\hat{\boldsymbol{\theta}}$  by maximizing  $p(\mathbf{D}, \boldsymbol{\xi} | \hat{\boldsymbol{\theta}})$ . Although an evaluation of the marginal likelihood  
 408 may be computationally challenging, some recently developed software, such as **AD Model Builder**  
 409 (Fournier *et al.* 2012) and **Template Model Builder** (Kristensen *et al.* 2016), can efficiently  
 410 approximate the marginal likelihood of a wide class of hierarchical models by using the Laplace  
 411 approximation. In contrast, in the latter approach, the focus of inference is the joint posterior  
 412 distribution of parameters and random effects  $p(\boldsymbol{\theta}, \boldsymbol{\xi} | \mathbf{D}) = \frac{p(\mathbf{D}, \boldsymbol{\xi} | \boldsymbol{\theta}) p(\boldsymbol{\theta})}{\int \int p(\mathbf{D}, \boldsymbol{\xi} | \boldsymbol{\theta}) p(\boldsymbol{\theta}) d\boldsymbol{\xi} d\boldsymbol{\theta}}$ , where a prior  
 413 distribution for parameters  $p(\boldsymbol{\theta})$  is needed to be specified. Although the integration over parameters  
 414 and random effects is not tractable in general, a Markov chain Monte Carlo (MCMC) method can be  
 415 used to obtain random samples from the posterior distribution. Several generic software are available  
 416 to run MCMC for a vast array of hierarchical models (e.g. Plummer 2003, Carpenter *et al.* 2017).

417 The joint likelihood of the model can be expressed as:

$$p(\mathbf{D}, \boldsymbol{\xi} | \boldsymbol{\theta}) = p(\boldsymbol{\xi} | \boldsymbol{\theta}) \prod_{i,j} p(\mathbf{D}_{ij} | \boldsymbol{\xi}, \boldsymbol{\theta}), \quad (14)$$

418 where  $p(\mathbf{D}_{ij} | \boldsymbol{\xi}, \boldsymbol{\theta})$  is the conditional likelihood derived from the observation model (Equations  
 419 12–13), and  $p(\boldsymbol{\xi} | \boldsymbol{\theta})$  represents a probability density of random effects that is determined by the  
 420 system model (Equations 4–6 and 10–11):

$$p(\boldsymbol{\xi} | \boldsymbol{\theta}) = \left\{ \prod_i \mathcal{N}(e_i^{(1)} | 0, \sigma_1^2) \mathcal{N}(u_i^{(1)} | 0, \tau_1^2) \right\} \left\{ \prod_j \mathcal{N}(e_j^{(2)} | 0, \sigma_2^2) \mathcal{N}(u_j^{(2)} | 0, \tau_2^2) \right\} \prod_{i,j} \mathcal{N}(e_{ij}^{(3)} | 0, \sigma_3^2), \quad (15)$$

421 where  $\mathcal{N}(x | 0, \sigma^2)$  denotes the probability density of a normal distribution with mean 0 and variance  
 422  $\sigma^2$  evaluated at  $x$ .

423 Once estimates (or posterior samples, in case of fully Bayesian approach) of random effects are  
 424 obtained, we can derive the estimates of  $\psi_{ij}$  and  $d_{ij}$ , denoted by  $\hat{\psi}_{ij}$  and  $\hat{d}_{ij}$ , respectively, by  
 425 substituting the estimates of random effects into Equations (3) and (9), respectively. Based on these

426 estimates, we can further derive estimates for a wide array of variables that are of ecological interest.  
427 For example, the number of modelled species, denoted by  $S_j$ , that are actually present in grid  $j$  can  
428 be estimated as:

$$\hat{S}_j = \sum_{i=1}^I \left\{ x_{ij} z_{ij} + (1 - x_{ij}) \hat{\psi}_{ij} \right\}. \quad (16)$$

429 Note that the use of the estimated occurrence probabilities  $\hat{\psi}$  enables this estimator to account for  
430 the possibility of the presence of species even when they are not detected in the replicated plots (*c.f.*,  
431 Dorazio & Royle 2005) or no detection-nondetection observation is available in the grid. Let  $\mathbf{N}_j$   
432 denotes the vector of abundance of all species in grid  $j$ . This vector represents the SAD, the  
433 property of an ecological community that we aimed to infer, and can be estimated for each grid as:

$$\hat{\mathbf{N}}_j = \left\{ \hat{d}_{ij} A_j \left[ x_{ij} z_{ij} + (1 - x_{ij}) \hat{\psi}_{ij} \right] \right\}_{1 \leq i \leq I}, \quad (17)$$

434 where  $A_j$  denotes the area of habitats in grid  $j$ . We can also estimate the SAD for a subset of the  
435 area of interest  $\mathcal{J}$ , denoted by  $\mathbf{N}_{\mathcal{J}}^*$ , as follows:

$$\hat{\mathbf{N}}_{\mathcal{J}}^* = \left\{ \sum_{j \in \mathcal{J}} \hat{d}_{ij} A_j \left[ x_{ij} z_{ij} + (1 - x_{ij}) \hat{\psi}_{ij} \right] \right\}_{1 \leq i \leq I}. \quad (18)$$

436 Note that the estimates of abundance of each species further permit to obtain various diversity  
437 indices that are a function of a vector of (relative) abundance, such as Shannon entropy and  
438 Gini-Simpson index, as well as other generalized metrics including phylogenetic/functional diversity  
439 indices and the Hill numbers (Chao *et al.* 2014).

## 440 **Related models**

441 Related classes of models that motivated our method include the Royle-Nichols model, which  
442 estimates the abundance of animals that are not detected perfectly from spatially replicated  
443 detection-nondetection observations (Royle & Nichols 2003), and its extension to community data  
444 developed by Yamaura *et al.* (2011). However, the proposed model may appear largely different from  
445 these models because both observation and system process are modelled differently: the models are  
446 rather aimed to describe observations of mobile animals that are subject to imperfect detection and  
447 thus do not assume Poisson point processes to derive an observation model. Another closely related

448 class of models is the multispecies site occupancy model which explains detection-nondetection  
449 observations of a number of species simultaneously in terms of the occurrence of species at each site  
450 (Dorazio & Royle 2005, Dorazio *et al.* 2006). Indeed, our estimator for species richness (Equation  
451 16) resembles that derived in Dorazio & Royle (2005). Fithian *et al.* (2015) introduced a  
452 multispecies version of the species distribution model (SDM) which integrates presence-absence data  
453 into the inhomogeneous Poisson process model for presence-only data. Their model component for  
454 presence-absence observations is a Bernoulli generalized linear model (GLM) with complementary  
455 log-log link (see also the related discussion by Dorazio (2014)). Models that jointly infer  
456 geographical distribution of many species have been recently named the joint species distribution  
457 models (JSDMs) (Warton *et al.* 2015).

## 458 **References**

- 459 Bates, D., Mächler, M., Bolker, B. & Walker, S. (2015) Fitting linear mixed-effects models using  
460 lme4. *Journal of Statistical Software*, **67**, 1–48.
- 461 Carpenter, B., Gelman, A., Hoffman, M.D., Lee, D., Goodrich, B., Betancourt, M., Brubaker, M.A.,  
462 Guo, J., Li, P. & Riddell, A. (2017) Stan: a probabilistic programming language. *Journal of*  
463 *Statistical Software*, **76**, 1–32.
- 464 Chao, A., Chiu, C.-H. & Jost, L. (2014) Unifying species diversity, phylogenetic diversity, functional  
465 diversity, and related similarity and differentiation measures through Hill numbers. *Annual Review*  
466 *of Ecology, Evolution, and Systematics*, **45**, 297–324.
- 467 Dorazio, R.M. (2014) Accounting for imperfect detection and survey bias in statistical analysis of  
468 presence-only data. *Global Ecology and Biogeography*, **23**, 1472–1484.
- 469 Dorazio, R.M. & Royle, J.A. (2005) Estimating size and composition of biological communities by  
470 modeling the occurrence of species. *Journal of the American Statistical Association*, **100**, 389–398.
- 471 Dorazio, R.M., Royle, J.A., Söderström, B. & Glimskär, A. (2006) Estimating species richness and  
472 accumulation by modeling species occurrence and detectability. *Ecology*, **87**, 842–854.
- 473 Evans, M.E.K., Merow, C., Record, S., McMahon, S.M. & Enquist, B.J. (2016) Towards  
474 process-based range modeling of many species. *Trends in Ecology and Evolution*, **31**, 860–871.

- 475 Fithian, W., Elith, J., Hastie, T. & Keith, D.A. (2015) Bias correction in species distribution  
476 models: pooling survey and collection data for multiple species. *Methods in Ecology and*  
477 *Evolution*, **6**, 424–438.
- 478 Fournier, D.A., Skaug, H.J., Ancheta, J., Ianelli, J., Magnusson, A., Maunder, M.N., Nielsen, A. &  
479 Sibert, J. (2012) AD Model Builder: using automatic differentiation for statistical inference of  
480 highly parameterized complex nonlinear models. *Optimization Methods and Software*, **27**, 233–249.
- 481 Iknayan, K.J., Tingley, M.W., Furnas, B.J. & Beissinger, S.R. (2014) Detecting diversity: emerging  
482 methods to estimate species diversity. *Trends in Ecology and Evolution*, **29**, 97–106.
- 483 Illian, J., Penttinen, A., Stoyan, H. & Stoyan, D. (2008) *Statistical Analysis and Modelling of Spatial*  
484 *Point Patterns*. Wiley.
- 485 Ives, A.R. & Helmus, M.R. (2011) Generalized linear mixed models for phylogenetic analyses of  
486 community structure. *Ecological Monographs*, **81**, 511–525.
- 487 Kaldhusdal, A., Brandl, R., Müller, J., Möst, L. & Hothorn, T. (2015) Spatio-phylogenetic  
488 multispecies distribution models. *Methods in Ecology and Evolution*, **6**, 187–197.
- 489 Kéry, M. & Royle, J.A. (2016) *Applied Hierarchical Modeling in Ecology: Analysis of Distribution,*  
490 *Abundance and Species Richness in R and BUGS. Volume 1: Prelude and Static Models*.  
491 Academic Press.
- 492 Kéry, M. & Schaub, M. (2012) *Bayesian Population Analysis using WinBUGS: A Hierarchical*  
493 *Perspective*. Academic Press.
- 494 King, R. (2014) Statistical ecology. *Annual Review of Statistics and Its Application*, **1**, 401–426.
- 495 Kristensen, K., Nielsen, A., Berg, C.W., Skaug, H. & Bell, B.M. (2016) TMB: automatic  
496 differentiation and Laplace approximation. *Journal of Statistical Software*, **70**, 1–21.
- 497 Merow, C., Wilson, A.M. & Jetz, W. (2017) Integrating occurrence data and expert maps for  
498 improved species range predictions. *Global Ecology and Biogeography*, **26**, 243–258.
- 499 Plummer, M. (2003) JAGS: A program for analysis of Bayesian graphical models using Gibbs  
500 sampling. *Proceedings of the 3rd international workshop on distributed statistical computing (DSC*  
501 *2003)*, volume 124, p. 125. Technische Universität Wien, Austria.

- 502 Royle, J.A. & Dorazio, R.M. (2008) *Hierarchical Modeling and Inference in Ecology: The Analysis of*  
503 *Data from Populations, Metapopulations and Communities*. Academic Press.
- 504 Royle, J.A. & Nichols, J.D. (2003) Estimating abundance from repeated presence-absence data or  
505 point counts. *Ecology*, **84**, 777–790.
- 506 Warton, D.I., Blanchet, F.G., O’Hara, R.B., Ovaskainen, O., Taskinen, S., Walker, S.C. & Hui,  
507 F.K.C. (2015) So many variables: joint modeling in community ecology. *Trends in Ecology and*  
508 *Evolution*, **30**, 766–779.
- 509 Yamaura, Y., Royle, J.A., Kuboi, K., Tada, T., Ikeno, S. & Makino, S. (2011) Modelling community  
510 dynamics based on species-level abundance models from detection/nondetection data. *Journal of*  
511 *Applied Ecology*, **48**, 67–75.

## 512 **Appendix B: An application to woody plant communities in East Asian islands**

### 513 **Estimation of species abundance and its validation**

514 We applied the proposed model to a dataset of woody plant communities in midlatitude forests in  
515 Japan. For the replicated detection-nondetection observations, we compiled a large dataset from  
516 vegetation surveys that consists of 40,547 georeferenced plots placed in natural forests between  
517  $24^{\circ}02' - 45^{\circ}30'$  N and  $122^{\circ}56' - 153^{\circ}59'$  E, which comprises the dataset of Kusumoto *et al.* (2015) and  
518 the national vegetation survey of Japan ([http://www.biodic.go.jp/english/kiso/vg/vg\\_kiso\\_e.html](http://www.biodic.go.jp/english/kiso/vg/vg_kiso_e.html)).  
519 The plot area ranged from 0.01 m<sup>2</sup> to 18,000 m<sup>2</sup>.

520 In the vegetation survey, species occurrence in the sampling plots (called “relevés”) is traditionally  
521 recorded according to cover classes for individual species. We converted these vegetation observations  
522 into detection-nondetection records by assigning 1 if the species appeared in the plot and 0 otherwise.  
523 In this analysis, we standardized the names of woody plant species and pooled the data for varieties  
524 and subspecies with those of their parent species. As a result, we obtained detection-nondetection  
525 observations for 1,248 species, which covers almost every woody plant species found in Japan.

526 We divided the entire study area into  $10 \times 10$  km grids (Kubota *et al.* 2015, 2017). We analysed  
527 in total 4,684 grids which covered ca. 99.5 % of the total land area of Japan. In total 3,695 grids  
528 contained at least one vegetation plot.

529 We also compiled the species occurrence information at a grid level based on multiple data  
530 sources. Species presence was registered from museum and herbarium specimens, species occurrence  
531 records, and distribution maps of plant species compiled in Horikawa (1972). Species absence was  
532 recorded from the distribution maps of Horikawa (1972) and regional species checklists compiled by  
533 prefectures of Japan.

534 The integrated model was fitted to these data by using the empirical Bayes estimation procedure  
535 implemented in the **Template Model Builder** (Kristensen *et al.* 2016), with the aid of **TMB**  
536 package (version 1.7.10) run in **R** (version 3.2.0). The estimates (and standard errors) of parameters  
537 were:  $\hat{\mu} = 4.575$  (0.043),  $\hat{\eta} = -3.267$  (0.074),  $\hat{\sigma}_1 = 1.373$  (0.030),  $\hat{\sigma}_2 = 0.680$  (0.009),  
538  $\hat{\sigma}_3 = 1.217$  (0.002),  $\hat{\tau}_1 = 2.551$  (0.052), and  $\hat{\tau}_2 = 0.956$  (0.010).

539 Based on the model estimates, the abundance of 1,248 woody plant species within natural forests  
540 was estimated for 4,684 grids by using Equation (17). The area of natural forest in each grid was



541 obtained based on the national survey of the natural environment

542 (<http://www.biodic.go.jp/trialSystem/EN/info/vg.html>).

543 The total woody plant abundance within the natural forest in Japan was estimated to  
544 approximately 20.4 billion, with the abundance of individual species ranging over six orders of  
545 magnitude, from species with  $10^8$  individuals to species with hundreds of individuals. The estimated  
546 total abundance approximately corresponded to 0.671% of the recent estimate for the number of  
547 trees worldwide (3.04 trillion; Crowther *et al.* 2015). This percentage parallels that of the total area  
548 under natural forests in Japan (0.367%) in relation to the area of forests around the globe, which  
549 was calculated based on the FAO statistics for 2015. Therefore, our estimate seems largely consistent  
550 with the global estimate of tree abundance (Crowther *et al.* 2015), which was independently  
551 obtained by using entirely different datasets and inference approaches.

552 The result highlighted geographical and latitudinal patterns of biodiversity over the East Asian  
553 islands (Fig. 3). The total abundance of woody plants revealed no apparent distinct latitudinal  
554 patterns, although it tended to be slightly smaller at lower latitudes where few large islands exist  
555 (Fig. 3A). By contrast, species richness and diversity index (represented by Shannon entropy)  
556 exhibited a clear, and similar, hump-shaped latitudinal gradient: species diversity was highest in the  
557 midlatitude zone of the Japanese archipelago, which has a substantial amount of land area, and  
558 decreased in both north and south directions (Fig. 3B, C). We observed that compared to species  
559 richness, diversity index shows a more mosaic-like geographical pattern (Fig. 3C). Estimates of  
560 species richness correlated strongly (Pearson's correlation coefficient 0.93; results not shown) with  
561 another set of estimates of species richness within 10 km square grid in the same region, which was  
562 obtained based on a different (while partially in common) dataset and inference (Kubota *et al.* 2015).

563 The estimates of species-specific abundance were validated based on data from geographically  
564 replicated forest inventory plots that were independent of the fitted data. We used three sources of  
565 forest inventory data that were collected in natural forests in Japan. They include the forest  
566 dynamics plots (FDP), the national forest inventory plots (NFI), and forest sampling plots along  
567 latitudinal and elevational gradients (FSLE). Sampling procedures and spatial coverage differed  
568 between the inventory data as we explain below.

569 The FDP dataset consists of species abundance data collected from 40 quadrats. In each quadrat,  
570 which was usually 1 ha in size, individuals with a diameter of  $\geq 15$  cm at breast height (DBH) were

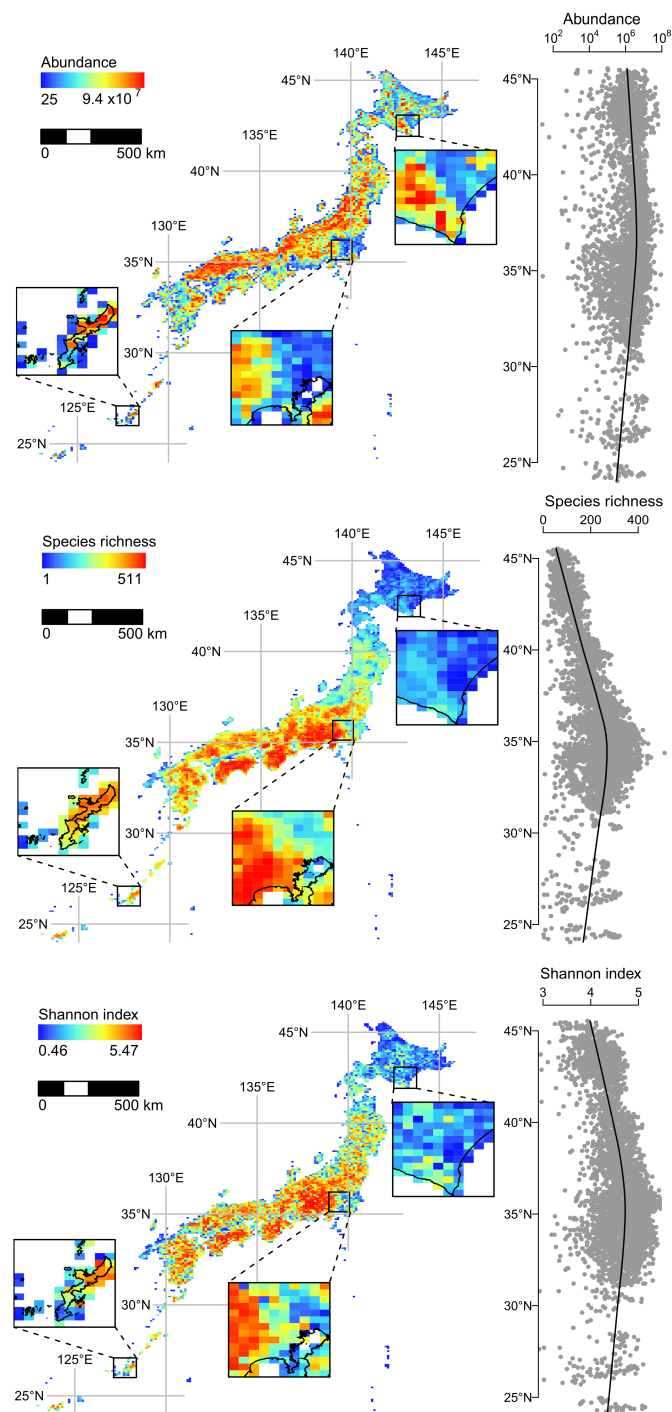

Fig. 3. Maps of community properties estimated in 10 km square grids. (A) total number of individuals (abundance), (B) number of species (species richness) and (C) species diversity index (Shannon entropy). To illustrate finer spatial patterns, three arbitrarily selected sections are enlarged.

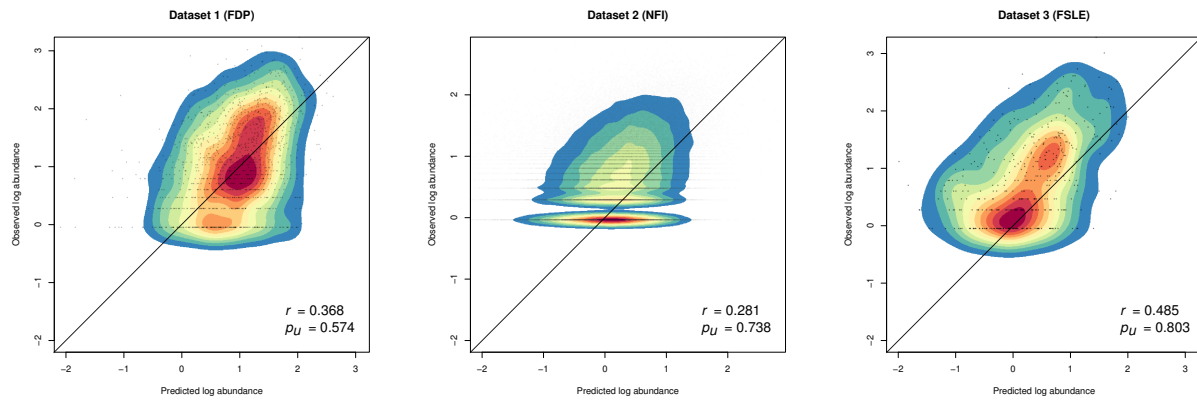

Fig. 4. **Result of the model validation.** Pearson's correlation coefficient ( $r$ ) between observed log abundance and predicted log abundance of species, and the probability of underprediction ( $p_u = \Pr[\text{Observed log abundance} > \text{Predicted log abundance}]$ ) are shown for three validation datasets of forest inventory plots, forest dynamics plots (FDP), national forest inventory (NFI), and forest sampling plots along latitudinal and elevational gradients (FSLE). The crossed lines are the identity lines.

571 monitored (<http://www.biodic.go.jp/moni1000/forest.html>). This dataset fairly represents the  
572 mosaic structure of forests with different developmental stages and thus is expected to precisely  
573 capture local population size for common climax species in old growth mountain forests, while it  
574 may poorly represent the population of pioneer or fugitive species, especially in lowland forests.

575 The NFI dataset included 7,674 plots in which woody plant individuals were assessed in nested  
576 concentric circular plots. Individuals with DBH > 1 cm were measured in a 0.01 ha circular area,  
577 while those with DBH > 5 cm and > 18 cm were surveyed in a 0.04 ha and 0.1 ha circle, respectively  
578 (<http://www.rinya.maff.go.jp/j/keikaku/tayouseichousa/>). The NFI plots were systematically placed  
579 in a 4 km × 4 km grid laid over entire Japan and thus were expected to provide less-biased samples  
580 of density of woody plants.

581 The FSLE dataset included 460 plots where woody plant individuals were surveyed in a 0.01 ha  
582 area (unpublished data by Y. Kubota). Plots were placed along the elevational and latitudinal  
583 gradients and thus were expected to reflect the environmental heterogeneity in the midlatitude  
584 forests.

585 For each grid that contains at least one forest inventory plot, observed abundance was compared  
586 to predicted abundance that was derived based on the model estimates. In order to predict the  
587 abundance in NFI plots, we set the area of each plot to 0.1 ha.

588 The predicted and observed log abundance of woody plant species were mildly correlated and

589 generally distributed around the identity line, although a tendency of the model to underpredict the  
590 abundance was also evident (Fig. 4). A possible explanation for this tendency of underprediction is  
591 the assumption of a superposed homogeneous Poisson point process for the spatial alignment of  
592 individuals, which was adopted to estimate the density of woody plants from replicated  
593 detection-nondetection observations (Appendix A). This assumption was indeed ecologically  
594 implausible, and may lead to an underestimation of individual density when violated because a  
595 spatial clustering of individuals inflates the probability of nondetection of species within a sampling  
596 plot (He & Gaston 2000, Yin & He 2014). We would therefore regard the model as giving a “first  
597 approximation” of species abundance in a large spatial extent. Although the model highlighted the  
598 geographical structure of biodiversity, a future modeling effort for accommodating more ecological  
599 realities are warranted to obtain better estimates.

#### 600 **Inference of metacommunity SADs**

601 Based on a previous biogeographic assessment of woody plants in the Japanese archipelago (Kubota  
602 *et al.* 2014) and Takhtajan’s floristic provinces (Takhtajan 1986), we divided the archipelago into  
603 four ecoregions (Fig. 1) and obtained metacommunity SADs by aggregating abundance estimates  
604 over grids within each ecoregion (Equation 18). The four ecoregions are defined as follows: (1) The  
605 *central continental arc region* is the largest ecoregion, which includes the three largest islands in  
606 Japan (Honshu, Shikoku, and Kyusyu). It encompasses deciduous and evergreen broad-leaved forests  
607 and belongs to the Takhtajan’s Japan-Korea province; 3,530 geographical grids belong to this  
608 ecoregion. (2) The *northern continental arc region* is the second largest ecoregion, and it includes  
609 Hokkaido, the second largest island of Japan. It encompasses coniferous and deciduous broad-leaved  
610 forests and belongs to the Takhtajan’s Sakhalin-Hokkaido province. The Tsugaru Strait separates  
611 the central continental arc region and northern continental arc region; 991 geographical grids belong  
612 to this ecoregion. (3) The *southern continental arc region* is composed of the Nansei Islands and  
613 separated from the central region by the Tokara Strait. It encompasses evergreen broad-leaved  
614 forests and belongs to the Takhtajan’s Tokara-Okinawa province. This ecoregion comprises 145  
615 geographical grids. (4) The *oceanic islands region* is composed of the Bonin (Ogasawara) Islands. It  
616 encompasses evergreen broad-leaved forests and belongs to the Takhtajan’s Volcano-Bonin province.  
617 Differing from other ecoregions, in which almost all the lands are continental islands, the oceanic

618 region is composed of oceanic islands only. It includes 18 geographical grids.

619 For each ecoregion, we fitted and compared three variants of the unified neutral theory of  
620 biodiversity and biogeography (UNTB) to the estimate of the metacommunity SAD. The fitted  
621 model includes the point mutation speciation model (Hubbell 2001, Etienne & Alonso 2005), the  
622 random fission speciation model (Etienne & Haegeman 2011), and the protracted speciation model  
623 (Rosindell *et al.* 2010); for these models, a probability function of the metacommunity species  
624 abundance vector (i.e. likelihood function for metacommunity SAD) and/or an analytical solution of  
625 the SAD in the stationary metacommunity has been obtained and can be used for model fitting.

626 The point mutation speciation model was fitted to the metacommunity SADs by using maximum  
627 likelihood method. The likelihood function for metacommunity SAD (i.e. assuming no dispersal  
628 limitation) under point mutation speciation model is known as the Ewens sampling formula (e.g.  
629 Equation 2 in Etienne & Alonso 2005). Formal likelihood-based inferences were, however, difficult to  
630 obtain for the other two models. Although a sampling formula has been acquired for a  
631 metacommunity under random fission models (Equation 38 in Etienne & Haegeman 2011), we were  
632 not able to apply this formula to our specific data as it underflows when the size of metacommunity  
633 is large, even when high precision arithmetic is used. We thus reached a compromise to use Equation  
634 21 in Etienne & Haegeman (2011), which was derived without considering the sampling process, but  
635 provides the equilibrium probability function of the species abundance vector in a metacommunity  
636 with a fixed size  $J_M$ . For protracted speciation model, no likelihood function was available. To fit  
637 this model, Rosindell *et al.* (2010) used “composite likelihood” that was suggested by Alonso &  
638 McKane (2004). This approach was however not practical in our case because of the large  
639 metacommunity size, thereby requiring an excess number of evaluations of the expected number of  
640 species with specific abundance. This prohibited its adoption in the numerical optimization  
641 procedure. We therefore applied a least square method to the Preston’s abundance octaves of  
642 metacommunities. We note that in addition to these three models, we also fitted the per-species  
643 speciation model of Etienne *et al.* (2007). However, this model consistently yielded boundary  
644 estimates that made the model identical to the point mutation speciation model. We thus omitted it  
645 from the comparison.

646 These differences in the fitting procedure render the model comparison complicated. To compare  
647 fitting of the models, while accounting for differences in the number of parameters (we note that

648 point mutation model and random fission model have one free parameter ( $\theta$ ) but protracted  
649 speciation model has two ( $\theta$  and  $\beta$ )), we prefer to use information criteria (McGill 2003, McGill  
650 *et al.* 2007) which relies on the formal maximum likelihood inference (Konishi & Kitagawa 2008).  
651 However, to fully utilize this approach was impossible in our application because the likelihood  
652 function was available only in the point mutation model. Thus, we compared the models based on  
653 the Akaike information criterion (AIC) and the Akaike weights (Burnham & Anderson 2002)  
654 calculated with “composite likelihood” (Alonso & McKane 2004), assuming that the parameter  
655 estimates of the random fission speciation model and protracted speciation model attain the  
656 maximum likelihood. In the model comparison, we also included a Poisson-lognormal mixture model  
657 (Bulmer 1974) as a flexible, simple baseline statistical model (McGill *et al.* 2007).

658 The objective function (i.e. negative log-likelihood or sum of squared error) of the variants of  
659 UNTB was minimized in terms of fundamental biodiversity number  $\theta$  (in addition to  $\beta$ , in the case  
660 of protracted speciation model). Estimates of the speciation rate  $\nu$  and mean species lifetime  $L$  were  
661 then derived as a function of these estimated parameters and metacommunity size  $J_M$ . In point  
662 mutation model,  $\nu$  relates to other quantities as  $\theta = \frac{\nu}{1-\nu}(J_M - 1)$  (Etienne & Alonso 2005), whereas  
663 in random fission model, the relationship is given as  $\theta = \sqrt{\nu}J_M$  (Etienne & Haegeman 2011). In the  
664 protracted speciation model, the corresponding equation is given as  $\theta = \frac{\mu}{1-\mu}(J_M - 1)$ , where  
665  $\mu = (1 + \tau)\nu$  and  $\tau = \frac{J_M - 1}{\beta} - 1$  (Rosindell *et al.* 2010). The average species lifetime is obtained from  
666 the general equation of Ricklefs (2003):  $L = \frac{\text{equilibrium number of species in metacommunity}}{\text{rate of production of new species}}$ . The  
667 corresponding formula is as follows: for point mutation speciation model,  $L \approx -\log \nu$ ; for random  
668 fission speciation model,  $L \approx \nu^{-\frac{1}{2}}$  (Etienne & Haegeman 2011); for protracted speciation model,  
669  $L \approx -\tau \log \tau \mu$  (Rosindell *et al.* 2010).

## 670 References

- 671 Alonso, D. & McKane, A.J. (2004) Sampling Hubbell’s neutral theory of biodiversity. *Ecology*  
672 *Letters*, **7**, 901–910.
- 673 Bulmer, M.G. (1974) On fitting the Poisson lognormal distribution to species-abundance data.  
674 *Biometrics*, **30**, 101–110.
- 675 Burnham, K.P. & Anderson, D.R. (2002) *Model Selection and Multimodel Inference: A Practical*  
676 *Information-Theoretic Approach*. Springer.

- 677 Crowther, T.W., Glick, H.B., Covey, K.R., Bettigole, C., Maynard, D.S., Thomas, S.M., Smith, J.R.,  
678 Hintler, G., Duguid, M.C., Amatulli, G., Tuanmu, M.-N., Jetz, W., Salas, C., Stam, C., Piotta,  
679 D., Tavani, R., Green, S., Bruce, G., Williams, S.J., Wiser, S.K., Huber, M.O., Hengeveld, G.M.,  
680 Nabuurs, G.-J., Tikhonova, E., Borchardt, P., Li, C.-F., Powrie, L.W., Fischer, M., Hemp, A.,  
681 Homeier, J., Cho, P., Vibrans, A.C., Umunay, P.M., Piao, S.L., Rowe, C.W., Ashton, M.S., Crane,  
682 P.R. & Bradford, M.A. (2015) Mapping tree density at a global scale. *Nature*, **525**, 201–205.
- 683 Etienne, R.S. & Alonso, D. (2005) A dispersal-limited sampling theory for species and alleles.  
684 *Ecology Letters*, **8**, 1147–1156.
- 685 Etienne, R.S., Apol, M.E.F., Olf, H. & Weissing, F.J. (2007) Modes of speciation and the neutral  
686 theory of biodiversity. *Oikos*, **116**, 241–258.
- 687 Etienne, R.S. & Haegeman, B. (2011) The neutral theory of biodiversity with random fission  
688 speciation. *Theoretical Ecology*, **4**, 87–109.
- 689 He, F. & Gaston, K.J. (2000) Estimating species abundance from occurrence. *American Naturalist*,  
690 **156**, 553–559.
- 691 Horikawa, Y. (1972) *Atlas of the Japanese Flora, An Introduction to Plant Sociology of East Asia*.  
692 Gakken.
- 693 Hubbell, S.P. (2001) *The Unified Neutral Theory of Biodiversity and Biogeography*. Princeton  
694 University Press.
- 695 Konishi, S. & Kitagawa, G. (2008) *Information Criteria and Statistical Modeling*. Springer.
- 696 Kristensen, K., Nielsen, A., Berg, C.W., Skaug, H. & Bell, B.M. (2016) TMB: automatic  
697 differentiation and Laplace approximation. *Journal of Statistical Software*, **70**, 1–21.
- 698 Kubota, Y., Hirao, T., Fujii, S., Shiono, T. & Kusumoto, B. (2014) Beta diversity of woody plants in  
699 the Japanese archipelago: the roles of geohistorical and ecological processes. *Journal of*  
700 *Biogeography*, **41**, 1267–1276.
- 701 Kubota, Y., Kusumoto, B., Shiono, T. & Tanaka, T. (2017) Phylogenetic properties of Tertiary relict  
702 flora in the east Asian continental islands: imprint of climatic niche conservatism and in situ  
703 diversification. *Ecography*, **40**, 436–447.

- 704 Kubota, Y., Shiono, T. & Kusumoto, B. (2015) Role of climate and geohistorical factors in driving  
705 plant richness patterns and endemism on the east Asian continental islands. *Ecography*, **38**,  
706 639–648.
- 707 Kusumoto, B., Shiono, T., Miyoshi, M., Maeshiro, R., Fujii, S., Kuuluvainen, T. & Kubota, Y.  
708 (2015) Functional response of plant communities to clearcutting: management impacts differ  
709 between forest vegetation zones. *Journal of Applied Ecology*, **52**, 171–180.
- 710 McGill, B.J., Etienne, R.S., Gray, J.S., Alonso, D., Anderson, M.J., Benecha, H.K., Dornelas, M.,  
711 Enquist, B.J., Green, J.L., He, F., Hurlbert, A.H., Magurran, A.E., Marquet, P.A., Maurer, B.A.,  
712 Ostling, A., Soykan, C.U., Ugland, K.I. & White, E.P. (2007) Species abundance distributions:  
713 moving beyond single prediction theories to integration within an ecological framework. *Ecology*  
714 *Letters*, **10**, 995–1015.
- 715 McGill, B. (2003) Strong and weak tests of macroecological theory. *Oikos*, **102**, 679–685.
- 716 Ricklefs, R.E. (2003) A comment on Hubbell’s zero-sum ecological drift model. *Oikos*, **100**, 185–192.
- 717 Rosindell, J., Cornell, S.J., Hubbell, S.P. & Etienne, R.S. (2010) Protracted speciation revitalizes the  
718 neutral theory of biodiversity. *Ecology Letters*, **13**, 716–727.
- 719 Takhtajan, A. (1986) *Floristic Regions of the World*. University of California Press.
- 720 Yin, D. & He, F. (2014) A simple method for estimating species abundance from occurrence maps.  
721 *Methods in Ecology and Evolution*, **5**, 336–343.
